# Supplementary material for: Automated chromatin profiling with spa-ChIP-seq uncovers the impacts of condition variations
Source: HighWire-hosted journal article supplement (doi:10.1101/gr.281320.125), 2025-12-12

## Adding a New Liquid Class to VWorks

1. Verify the system type, 32 or 64 bit, by going to Control Panel > System and Security > System

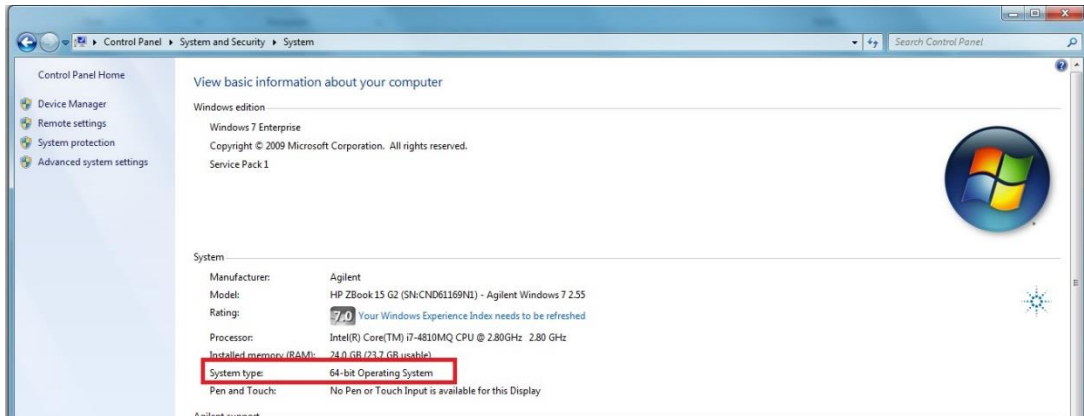

2. Find the appropriate file, 32 or 64 bit. If file is send as a .txt file, rename changing the extension to .reg
3. Double-click on the .reg file. You will get the following error

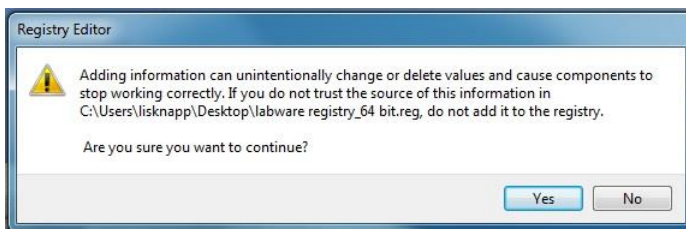

Select "Yes"

4. Once you have done this, you will get the following message

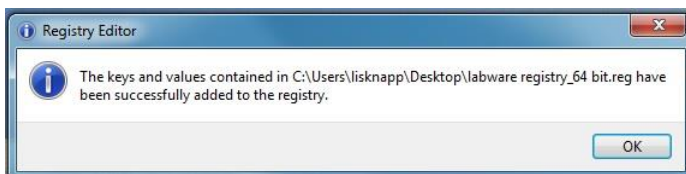

Supplement: Supplemental_Files.zip [file Adding a New Liquid Class to VWorks.pdf › On-Bead_ChIP-seq_v.A1.0.2/SETUP/How To/Adding a New Liquid Class to VWorks.pdf]
