# Supplementary material for: Automated chromatin profiling with spa-ChIP-seq uncovers the impacts of condition variations
Source: HighWire-hosted journal article supplement (doi:10.1101/gr.281320.125), 2025-12-12
Supplement: Supplemental_Files.zip [file Plate_Layouts_ChIP-seq.xlsb.xlsx]

## Sheet: Protocol Plates by Pool
View at 80% on a 1920 * 1080 monitor to get the images to the same size as used on the Form
		1 pool															2 pool															2 pool															3 pool
			1	2	3	4	5	6	7	8	9	10	11	12																			1	2	3	4	5	6	7	8	9	10	11	12				1	2
		A																														A															A
		B																														B															B
		C																														C															C
		D																														D															D
		E																														E															E
		F																														F															F
		G																														G															G
		H																	1	2	3	4	5	6	7	8	9	10	11	12		H															H
			on RED insert															A															on RED insert															on RED insert
																		B
																		C
			1	2	3	4	5	6	7	8	9	10	11	12				D															1	2	3	4	5	6	7	8	9	10	11	12				1	2
		A																E														A															A
		B																F														B															B
		C																G														C															C
		D																H														D															D
		E																														E															E
		F																														F															F
		G																														G															G
		H																														H															H
			on RED insert																														on RED insert															on RED insert
																		B
																		C
			1	2	3	4	5	6	7	8	9	10	11	12				D															1	2	3	4	5	6	7	8	9	10	11	12				1	2
		A																E														A															A
		B																F														B															B
		C																G														C															C
		D																H														D															D
		E																														E															E
		F																														F															F
		G																														G															G
		H																														H															H
			on RED insert																														on RED insert															on RED insert
			1	2	3	4	5	6	7	8	9	10	11	12				D															1	2	3	4	5	6	7	8	9	10	11	12				1	2
		A																E														A															A
		B																F														B															B
		C																G														C															C
		D																H														D															D
		E																														E															E
		F																														F															F
		G																														G															G
		H																														H															H
			on RED insert																														on RED insert															on RED insert
																		B
																		C
			1	2	3	4	5	6	7	8	9	10	11	12				D															1	2	3	4	5	6	7	8	9	10	11	12				1	2
		A																E														A															A
		B																F														B															B
		C																G														C															C
		D																H														D															D
		E																														E															E
		F																														F															F
		G																														G															G
		H																														H															H
			on RED insert																														on RED insert															on RED insert
			1	2	3	4	5	6	7	8	9	10	11	12				D															1	2	3	4	5	6	7	8	9	10	11	12				1	2
		A																E														A															A
		B																F														B															B
		C																G														C															C
		D																H														D															D
		E																														E															E
		F																														F															F
		G																														G															G
		H																														H															H
																		B
																		C
			1	2	3	4	5	6	7	8	9	10	11	12				D															1	2	3	4	5	6	7	8	9	10	11	12				1	2
		A																E														A															A
		B																F														B															B
		C																G														C															C
		D																H														D															D
		E																														E															E
		F																														F															F
		G																														G															G
		H																														H															H
			1	2	3	4	5	6	7	8	9	10	11	12					1	2	3	4	5	6	7	8	9	10	11	12			1	2	3	4	5	6	7	8	9	10	11	12				1	2
		A																A														A															A
		B																B														B															B
		C																C														C															C
		D																D														D															D
		E																E														E															E
		F																F														F															F
		G																G														G															G
		H																H														H															H
			1	2	3	4	5	6	7	8	9	10	11	12																			1	2	3	4	5	6	7	8	9	10	11	12				1	2
		A																														A															A
		B																														B															B
		C																														C															C
		D																														D															D
		E																														E															E
		F																														F															F
		G																														G															G
		H																														H															H
[truncated: 82 more columns]

## Sheet: Protocol Plates by Col
View at 80% on a 1920 * 1080 monitor to get the images to the same size as used on the Form
																Master Mix																1 Cols																2 Cols
		1	2	3	4	5	6	7	8	9	10	11	12				1	2	3	4	5	6	7	8	9	10	11	12					1	2	3	4	5	6	7	8	9	10	11	12					D
	A															A																A																	E
	B															B																B																	F
	C															C																C																	G
	D															D																D																	H
	E															E																E
	F															F																F
	G															G																G
	H															H																H
		1	2	3	4	5	6	7	8	9	10	11	12				1	2	3	4	5	6	7	8	9	10	11	12					1	2	3	4	5	6	7	8	9	10	11	12					D
	A															A																A																	E
	B															B																B																	F
	C															C																C																	G
	D															D																D																	H
	E															E																E
	F															F																F
	G															G																G
	H															H																H
		1	2	3	4	5	6	7	8	9	10	11	12				1	2	3	4	5	6	7	8	9	10	11	12					1	2	3	4	5	6	7	8	9	10	11	12
	A															A																A																	A
	B															B																B																	B
	C															C																C																	C
	D															D																D																	D
	E															E																E																	E
	F															F																F																	F
	G															G																G																	G
	H															H																H																	H
		1	2	3	4	5	6	7	8	9	10	11	12				1	2	3	4	5	6	7	8	9	10	11	12					1	2	3	4	5	6	7	8	9	10	11	12
	A															A																A
	B															B																B
	C															C																C
	D															D																D
	E															E																E
	F															F																F
	G															G																G
	H															H																H
		1	2	3	4	5	6	7	8	9	10	11	12				1	2	3	4	5	6	7	8	9	10	11	12					1	2	3	4	5	6	7	8	9	10	11	12
	A															A																A
	B															B																B
	C															C																C
	D															D																D
	E															E																E
	F															F																F
	G															G																G
	H															H																H
		1	2	3	4	5	6	7	8	9	10	11	12				1	2	3	4	5	6	7	8	9	10	11	12					1	2	3	4	5	6	7	8	9	10	11	12
	A															A																A
	B															B																B
	C															C																C
	D															D																D
	E															E																E
	F															F																F
	G															G																G
	H															H																H
		1	2	3	4	5	6	7	8	9	10	11	12				1	2	3	4	5	6	7	8	9	10	11	12					1	2	3	4	5	6	7	8	9	10	11	12
	A															A																A
	B															B																B
	C															C																C
	D															D																D
	E															E																E
	F															F																F
	G															G																G
	H															H																H
		1	2	3	4	5	6	7	8	9	10	11	12				1	2	3	4	5	6	7	8	9	10	11	12					1	2	3	4	5	6	7	8	9	10	11	12
	A															A																A
	B															B																B
	C															C																C
	D															D																D
	E															E																E
	F															F																F
	G															G																G
	H															H																H
		1	2	3	4	5	6	7	8	9	10	11	12				1	2	3	4	5	6	7	8	9	10	11	12					1	2	3	4	5	6	7	8	9	10	11	12					D
	A															A																A																	E
	B															B																B																	F
	C															C																C																	G
	D															D																D																	H
	E															E																E
	F															F																F
	G															G																G
	H															H																H
[truncated: 264 more columns]

## Sheet: Res
		View at 80% on a 1920 * 1080 monitor to get the images to the same size as used on the Form
																				: Empty						: EtOH
																	2 Cols
		1	2	3	4	5	6	7	8	9	10	11	12					D
	A																	E
	B																	F
	C																	G
	D																	H
	E
	F
	G
	H
		1	2	3	4	5	6	7	8	9	10	11	12
	A
	B
	C
	D
	E
	F
	G
	H
		1	2	3	4	5	6	7	8	9	10	11	12
	A
	B
	C
	D
	E
	F
	G
	H
		1	2	3	4	5	6	7	8	9	10	11	12
	A
	B
	C
	D
	E
	F
	G
	H
		1	2	3	4	5	6	7	8	9	10	11	12
	A
	B
	C
	D
	E
	F
	G
	H

## Sheet: Keys with volumes
1								Protocol 1a																						Protocol 1b													Protocol 1c
						5			>5	:uL/well Sheared Sample									: UltraPure Water												: Sample from previous protocol												: Sample from previous protocol
			5	34.8	1.2	34.8				:uL/well 5M NaCl									: Empty								110			120	:uL/well SpeedBead MM												: TT Buffer
	Ultra Pure Water		20	24					34.8	:uL/well Rxn Mix																	120	1.2				SpeedBead MM:											: EtOH
																														19.2uL of SpeedBeads + 518.4uL of 40% PEG soln + 345.6uL 5M NaCl + 76.8uL of H2O = Total Volume
	10% SDS		4	4.8								Reaction Mix:	192uL of Ultra Pure Water + 38.4uL of 10% SDS + 28.8uL of 0.5M EDTA + 9.6uL of RNAse A + 9.6uL of Proteninase K = Total Volume														64.8																: Empty
	0.5M EDTA		3	3.6																							2.4
	RNAse A		1	1.2																							9.6
	Proteninase K		1	1.2																							43.2
2								Protocol 1a																						Protocol 1b													Protocol 1c
						5			>5	:uL/well Sheared Sample									: UltraPure Water												: Sample from previous protocol												: Sample from previous protocol
			5	69.6	1.2	40.6				:uL/well 5M NaCl									: Empty								215			240	:uL/well SpeedBead MM												: TT Buffer
	Ultra Pure Water		20	48					69.6	:uL/well Rxn Mix																100	240	1.2				SpeedBead MM:											: EtOH
																														38.4uL of SpeedBeads + 1036.8uL of 40% PEG soln + 691.2uL 5M NaCl + 153.6uL of H2O = Total Volume
	10% SDS		4	9.6								Reaction Mix:	384uL of Ultra Pure Water + 76.8uL of 10% SDS + 57.6uL of 0.5M EDTA + 19.2uL of RNAse A + 19.2uL of Proteninase K = Total Volume													54	129.6
	0.5M EDTA		3	7.2																						2	4.8
	RNAse A		1	2.4																						8	19.2
	Proteninase K		1	2.4																						36	86.4
3								Protocol 1a																						Protocol 1b													Protocol 1c
						5			>5	:uL/well Sheared Sample									: UltraPure Water												: Sample from previous protocol												: Sample from previous protocol
			5	104.4	1.2	46.4				:uL/well 5M NaCl									: Empty								320			360	:uL/well SpeedBead MM												: TT Buffer
	Ultra Pure Water		20	72					104.4	:uL/well Rxn Mix																100	360	1.2				SpeedBead MM:											: EtOH
																														57.6uL of SpeedBeads + 1555.2uL of 40% PEG soln + 1036.8uL 5M NaCl + 230.4uL of H2O = Total Volume
	10% SDS		4	14.4								Reaction Mix:	576uL of Ultra Pure Water + 115.2uL of 10% SDS + 86.4uL of 0.5M EDTA + 28.8uL of RNAse A + 28.8uL of Proteninase K = Total Volume													54	194.4
	0.5M EDTA		3	10.8																						2	7.2
	RNAse A		1	3.6																						8	28.8
	Proteninase K		1	3.6																						36	129.6
4								Protocol 1a																						Protocol 1b													Protocol 1c
						5			>5	:uL/well Sheared Sample									: UltraPure Water												: Sample from previous protocol												: Sample from previous protocol
			5	139.2	1.2	52.2				:uL/well 5M NaCl									: Empty								425			480	:uL/well SpeedBead MM												: TT Buffer
	Ultra Pure Water		20	96					139.2	:uL/well Rxn Mix																100	480	1.2				SpeedBead MM:											: EtOH
																														76.8uL of SpeedBeads + 2073.6uL of 40% PEG soln + 1382.4uL 5M NaCl + 307.2uL of H2O = Total Volume
	10% SDS		4	19.2								Reaction Mix:	768uL of Ultra Pure Water + 153.6uL of 10% SDS + 115.2uL of 0.5M EDTA + 38.4uL of RNAse A + 38.4uL of Proteninase K = Total Volume													54	259.2
	0.5M EDTA		3	14.4																						2	9.6
	RNAse A		1	4.8																						8	38.4
	Proteninase K		1	4.8																						36	172.8
5								Protocol 1a																						Protocol 1b													Protocol 1c
						5			>5	:uL/well Sheared Sample									: UltraPure Water												: Sample from previous protocol												: Sample from previous protocol
			5	174	1.2	58				:uL/well 5M NaCl									: Empty								530			600	:uL/well SpeedBead MM												: TT Buffer
	Ultra Pure Water		20	120					174	:uL/well Rxn Mix																100	600	1.2				SpeedBead MM:											: EtOH
																														96uL of SpeedBeads + 2592uL of 40% PEG soln + 1728uL 5M NaCl + 384uL of H2O = Total Volume
	10% SDS		4	24								Reaction Mix:	960uL of Ultra Pure Water + 192uL of 10% SDS + 144uL of 0.5M EDTA + 48uL of RNAse A + 48uL of Proteninase K = Total Volume													54	324
	0.5M EDTA		3	18																						2	12
	RNAse A		1	6																						8	48
	Proteninase K		1	6																						36	216
6								Protocol 1a																						Protocol 1b													Protocol 1c
						5			>5	:uL/well Sheared Sample									: UltraPure Water												: Sample from previous protocol												: Sample from previous protocol
			5	208.8	1.2	63.8				:uL/well 5M NaCl									: Empty								625			720	:uL/well SpeedBead MM												: TT Buffer
	Ultra Pure Water		20	144					208.8	:uL/well Rxn Mix																100	720	1.2				SpeedBead MM:											: EtOH
																														115.2uL of SpeedBeads + 3110.4uL of 40% PEG soln + 2073.6uL 5M NaCl + 460.8uL of H2O = Total Volume
	10% SDS		4	28.8								Reaction Mix:	1152uL of Ultra Pure Water + 230.4uL of 10% SDS + 172.8uL of 0.5M EDTA + 57.6uL of RNAse A + 57.6uL of Proteninase K = Total Volume													54	388.8
	0.5M EDTA		3	21.6																						2	14.4
	RNAse A		1	7.2																						8	57.6
	Proteninase K		1	7.2																						36	259.2
7								Protocol 1a																						Protocol 1b													Protocol 1c
						5			>5	:uL/well Sheared Sample									: UltraPure Water												: Sample from previous protocol												: Sample from previous protocol
			5	243.6	1.2	69.6				:uL/well 5M NaCl									: Empty								740			840	:uL/well SpeedBead MM												: TT Buffer
	Ultra Pure Water		20	168					243.6	:uL/well Rxn Mix																100	840	1.2				SpeedBead MM:											: EtOH
																														134.4uL of SpeedBeads + 3628.8uL of 40% PEG soln + 2419.2uL 5M NaCl + 537.6uL of H2O = Total Volume
	10% SDS		4	33.6								Reaction Mix:	1344uL of Ultra Pure Water + 268.8uL of 10% SDS + 201.6uL of 0.5M EDTA + 67.2uL of RNAse A + 67.2uL of Proteninase K = Total Volume													54	453.6
	0.5M EDTA		3	25.2																						2	16.8
	RNAse A		1	8.4																						8	67.2
	Proteninase K		1	8.4																						36	302.4
8								Protocol 1a																						Protocol 1b													Protocol 1c
						5			>5	:uL/well Sheared Sample									: UltraPure Water												: Sample from previous protocol												: Sample from previous protocol
			5	278.4	1.2	75.4				:uL/well 5M NaCl									: Empty								845			960	:uL/well SpeedBead MM												: TT Buffer
	Ultra Pure Water		20	192					278.4	:uL/well Rxn Mix																100	960	1.2				SpeedBead MM:											: EtOH
																														153.6uL of SpeedBeads + 4147.2uL of 40% PEG soln + 2764.8uL 5M NaCl + 614.4uL of H2O = Total Volume
	10% SDS		4	38.4								Reaction Mix:	1536uL of Ultra Pure Water + 307.2uL of 10% SDS + 230.4uL of 0.5M EDTA + 76.8uL of RNAse A + 76.8uL of Proteninase K = Total Volume													54	518.4
	0.5M EDTA		3	28.8																						2	19.2
	RNAse A		1	9.6																						8	76.8
	Proteninase K		1	9.6																						36	345.6
9								Protocol 1a																						Protocol 1b													Protocol 1c
						5			>5	:uL/well Sheared Sample									: UltraPure Water												: Sample from previous protocol												: Sample from previous protocol
			5	313.2	1.2	81.2				:uL/well 5M NaCl									: Empty								950			1080	:uL/well SpeedBead MM												: TT Buffer
	Ultra Pure Water		20	216					313.2	:uL/well Rxn Mix																100	1080	1.2				SpeedBead MM:											: EtOH
																														172.8uL of SpeedBeads + 4665.6uL of 40% PEG soln + 3110.4uL 5M NaCl + 691.2uL of H2O = Total Volume
	10% SDS		4	43.2								Reaction Mix:	1728uL of Ultra Pure Water + 345.6uL of 10% SDS + 259.2uL of 0.5M EDTA + 86.4uL of RNAse A + 86.4uL of Proteninase K = Total Volume													54	583.2
	0.5M EDTA		3	32.4																						2	21.6
	RNAse A		1	10.8																						8	86.4
	Proteninase K		1	10.8																						36	388.8
10								Protocol 1a																						Protocol 1b													Protocol 1c
						5			>5	:uL/well Sheared Sample									: UltraPure Water												: Sample from previous protocol												: Sample from previous protocol
			5	348	1.2	87				:uL/well 5M NaCl									: Empty								1055			1200	:uL/well SpeedBead MM												: TT Buffer
	Ultra Pure Water		20	240					348	:uL/well Rxn Mix																100	1200	1.2				SpeedBead MM:											: EtOH
																														192uL of SpeedBeads + 5184uL of 40% PEG soln + 3456uL 5M NaCl + 768uL of H2O = Total Volume
	10% SDS		4	48								Reaction Mix:	1920uL of Ultra Pure Water + 384uL of 10% SDS + 288uL of 0.5M EDTA + 96uL of RNAse A + 96uL of Proteninase K = Total Volume													54	648
	0.5M EDTA		3	36																						2	24
	RNAse A		1	12																						8	96
	Proteninase K		1	12																						36	432
11								Protocol 1a																						Protocol 1b													Protocol 1c
						5			>5	:uL/well Sheared Sample									: UltraPure Water												: Sample from previous protocol												: Sample from previous protocol
			5	382.8	1.2	92.8				:uL/well 5M NaCl									: Empty								1160			1320	:uL/well SpeedBead MM												: TT Buffer
	Ultra Pure Water		20	264					382.8	:uL/well Rxn Mix																100	1320	1.2				SpeedBead MM:											: EtOH
																														211.2uL of SpeedBeads + 5702.4uL of 40% PEG soln + 3801.6uL 5M NaCl + 844.8uL of H2O = Total Volume
	10% SDS		4	52.8								Reaction Mix:	2112uL of Ultra Pure Water + 422.4uL of 10% SDS + 316.8uL of 0.5M EDTA + 105.6uL of RNAse A + 105.6uL of Proteninase K = Total Volume													54	712.8
	0.5M EDTA		3	39.6																						2	26.4
	RNAse A		1	13.2																						8	105.6
	Proteninase K		1	13.2																						36	475.2
12								Protocol 1a																						Protocol 1b													Protocol 1c
						5			>5	:uL/well Sheared Sample									: UltraPure Water												: Sample from previous protocol												: Sample from previous protocol
			5	417.6	1.2	98.6				:uL/well 5M NaCl									: Empty								1265			1440	:uL/well SpeedBead MM												: TT Buffer
	Ultra Pure Water		20	288					417.6	:uL/well Rxn Mix																100	1440	1.2				SpeedBead MM:											: EtOH
																														230.4uL of SpeedBeads + 6220.8uL of 40% PEG soln + 4147.2uL 5M NaCl + 921.6uL of H2O = Total Volume
	10% SDS		4	57.6								Reaction Mix:	2304uL of Ultra Pure Water + 460.8uL of 10% SDS + 345.6uL of 0.5M EDTA + 115.2uL of RNAse A + 115.2uL of Proteninase K = Total Volume													54	777.6
	0.5M EDTA		3	43.2																						2	28.8
	RNAse A		1	14.4																						8	115.2
	Proteninase K		1	14.4																						36	518.4

## Sheet: Inserts
View at 80% on a 1920 * 1080 monitor to get the images to the same size as used on the Form
		1	2	3	4	5	6	7	8	9	10	11	12				1	2	3	4	5	6	7	8	9	10	11	12					1	2	3	4	5	6	7	8	9	10	11	12
	A															A																A
	B															B																B
	C															C																C
	D															D																D
	E															E																E
	F															F																F
	G															G																G
	H															H																H
		RED insert															SILVER insert

## Sheet: Sheet1
Liquid Classes Used	Labware Used	Dev Files Used	Bravo Profiles Used
96 disposable tip 1 - 2ul	96 Agilent Deep Sqr Well 201240-100	Bravo_round_magnet_RedInsert.dev	Bravo-Red Insert Mag and Shaker
96 disposable tip 2 - 10ul aq	96 Agilent Deep Well 1 mL 203426-100
96 disposable tip 2 - 50ul	96 Agilent Deep Reservoir 201244-100
96 disposable tip 10 - 50ul aq	96 Agilent Shallow Reservoir 201254-100
96 disposable tip 11 ul- 50ul	96 BioRad HardShell HighProfile HalfSkirt PCR
96 disposable tip 50 - 180ul aq	96 BioRad HS half skirt PCR in Red Alum Insert
96 disposable tip 50 - 180ul aq mix	96 BioRad HSP PCR
96 disposable tip 51 - 200ul	96 Costar7007 Rnd Well U Btm
	96 Deep Well PP Sqr Well V Btm
fixed tip 0.05 - 1ul	96 Eppendorf DeepWell 1mL
fixed tip 1 - 3ul	96 Eppendorf DeepWell 2mL
fixed tip 3 - 10ul	96 Eppendorf Twin.tec half skirt PCR in Red Alum Insert
fixed tip 51 - 200ul	96 Eppendorf Twin.tec PCR
	96 Nunc Deep Well 1 mL
Bead Mixing	96 Strip Tubes in Red Alum Insert
Capture Mix 2	96 V11 LT250 Tip Box 19477.002
dispense then long wait
Ethanol to waste
Slow blowout
