# Supplementary material for: Automated chromatin profiling with spa-ChIP-seq uncovers the impacts of condition variations
Source: HighWire-hosted journal article supplement (doi:10.1101/gr.281320.125), 2025-12-12
Supplement: Supplemental_Files.zip [file Readme.pdf › On-Bead_ChIP-seq_v.A1.0.2/Readme.pdf]

## spa-ChIP-seq protocol readme:

The spa-ChIP-seq protocol was created using Agilent Bravo device, however, it should be compatible with any liquid handler that allows for the following requirements: (1) the ability to pipette a range of small volumes, from 1  $\mu$ L to 180  $\mu$ L; (2) allow for multiple liquid types from glycerol to water to ethanol, which requires different pipetting speeds for accuracy; (3) as some of the steps require removal of liquid without disturbing the pellets, spa-ChIP-seq also requires the ability to aspirate at slow speed; (4) lastly, while not required, the ability to perform mixing and temperature-controlled operations on deck reduces the operational time. Our contact information is: Yuwei Cao ([yuc408@ucsd.edu](mailto:yuc408@ucsd.edu)) and Alon Goren ([agoren@ucsd.edu](mailto:agoren@ucsd.edu)).

Before initiating any protocols perform the following:

*\*Note: Any .reg files added will overwrite existing entries. If those files don't exist on the system then protocols will not perform as intended.*

- 1) Import labware
  - a. Double click registry entries located here: <C:\VWorks Workspace\NGS Option A\On-Bead ChIP-seq v.A1.0.2\SETUP\Labware>
  - b. Add the labware to the standard plate pad group
  - c. Detailed instructions here: <C:\VWorks Workspace\NGS Option A\On-Bead ChIP-seq v.A1.0.2\SETUP\How To\Adding a New Piece of Labware to VWorks.pdf>
- 2) Import liquid classes
  - a. Double click registry entries located here: <C:\VWorks Workspace\NGS Option A\On-Bead ChIP-seq v.A1.0.2\SETUP\Liquid Classes>
  - b. Add the labware to the standard plate pad group
  - c. Detailed instructions here: <C:\VWorks Workspace\NGS Option A\On-Bead ChIP-seq v.A1.0.2\SETUP\How To\ Adding a New Liquid Class to VWorks.pdf>
- 3) Add the “Sounds” Folder to the VWorks Workspace Folder
  - a. Copy the “Sounds” Folder from here: <C:\VWorks Workspace\NGS Option A\On-Bead ChIP-seq v.A1.0.2\SETUP\Sounds>
  - b. Paste the folder here: <C:\VWorks Workspace\Sounds>
- 4) Ensure the device file is linked to the proper Bravo profile and that it has the correct name.
  - a. Find the device file here: <C:\VWorks Workspace\NGS Option A\On-Bead ChIP-seq v.A1.0.2\Device Files>
  - b. The only device file used for these protocols is:  
Bravo\_round\_magnet\_RedInsert.dev
  - c. The Bravo profile associated with this device file is: Bravo-Red Insert Mag and Shaker.reg
  - d. The Bravo should be named: Bravo – 1

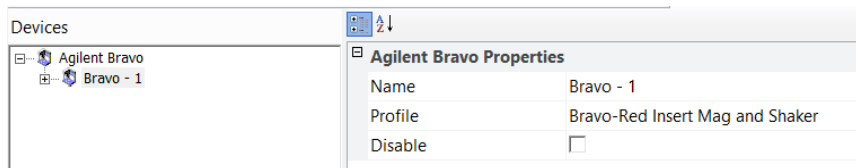

- e. Detailed instructions for creating this profile are located here: <C:\VWorks Workspace\NGS Option A\On-Bead ChIP-seq v.A1.0.2\SETUP\How To\ NGS Bravo Setup Consolidated Profile Document.pdf>

- f. An example that can be used in simulation is located here: [C:\VWorks\Workspace\NGS Option A\On-Bead\\_ChIP-seq\\_v.A1.0.2\SETUP\Profiles](C:\VWorks\Workspace\NGS Option A\On-Bead_ChIP-seq_v.A1.0.2\SETUP\Profiles)
  - i. Double click on the file to add it to the registry
